# Supplementary material for: Facial EMG Responses to Emotional Expressions Are Related to Emotion Perception Ability
Source: PLOS journal article supplement (doi:10.1371/journal.pone.0084053), 2014-01-28
Supplement: S6 (10.1371/journal.pone.0084053.s006) [file journal.pone.0084053.s006]

Table S6. Standardized factor loadings of measurement model of face perception and nested emotion perception

| factor               | FP    |       |       |       |       | EP    |       |       |       |       |       |
|----------------------|-------|-------|-------|-------|-------|-------|-------|-------|-------|-------|-------|
|                      | face1 | face2 | face3 | face4 | face5 | emo1  | emo2  | emo3  | emo1  | emo2  | emo3  |
| standardized loading | .597* | .501* | .479* | .734* | .642* | .438* | .413* | .516* | .311* | .350* | .461* |

\* $p < .05$ , two-tailed.
